# Supplementary material
Source: PubMed Central journal article supplement (PMC2725581)
Supplement: supp_191_16_5147__1.pdf [file supp_191_16_5147__1.pdf]

1 Supplementary Table S1. Primers used in this study.

| Primers                                 | Nucleotide sequences                      |
|-----------------------------------------|-------------------------------------------|
| <b>Phospho-transfer cloning primers</b> |                                           |
| <i>cqsS</i> _PTP_HK_F                   | CACCTTGTTCCGTAACCAAATCTCTC                |
| <i>cqsS</i> _PTP_HK_R                   | TTATTCTGTTTTATCTCGTTAACCGTATC             |
| <i>cqsS</i> _PTP_RD_F                   | CACCTTGCAGCGTATTTTGGTG                    |
| <i>cqsS</i> _PTP_RD_R                   | TTACACCCAAGCTGCCACTTTAT                   |
| <i>luxQ</i> _PTP_HK_F                   | CACCTTGCAAGCCGCAAGGCGC                    |
| <i>luxQ</i> _PTP_HK_R                   | TTACGGCGCATCCGGTTTTTCTA                   |
| <i>luxQ</i> _PTP_RD_F                   | CACCTTGCTGCGTGTACTGTTGGTG                 |
| <i>luxQ</i> _PTP_RD_R                   | TTAATTTAAGCCAGCGTTTTTTTGGC                |
| <i>luxO</i> _PTP_RD_F                   | CACCTTGGTAGAAGACACGGCGTC                  |
| <i>luxO</i> _PTP_RD_R                   | TTATTTGAGTTTCGAGGCTTTGC                   |
| <i>luxO</i> _PTP_R                      | TTACCGTTCTTCTCTTTTTCTT                    |
| <i>luxU</i> _PTP_F                      | CACCTTGAGAGAATGGATCAACCA                  |
| <i>luxU</i> _PTP_R                      | TTAATGAATAAATCGGAGTAGCATTG                |
| <i>vpsR</i> _PTP_RD_F                   | CACCTTGAGCACTCAATTCCGTATGG                |
| <i>vpsR</i> _PTP_RD_R                   | TTACTTTTCCAACCTCAGCATGC                   |
| <i>vpsR</i> _PTP_R                      | TTAGAAGTTTTCATCGGTGATCA                   |
| <i>vpsS</i> _PTP_HK_F                   | CACCTTGCCTTTGGCGCA                        |
| <i>vpsS</i> _PTP_HK_R                   | TTACGGTTTAATATTTTTCAAGCGAG                |
| <i>vpsS</i> _PTP_RD_F                   | CACCTTGCATCACATTCTTGTGTG                  |
| <i>vpsS</i> _PTP_RD_R                   | TTATGGATTAAGGAAACGTTTCA                   |
| <i>vpsS</i> _PTP_F                      | CACCTTGAAAATGGATTCTGAATACAC               |
| VC0303_PTP_RD_F                         | CACCTTGCTGCAACATCTGCGTGTGCT               |
| VC0303_PTP_RD_R                         | TTAAGACAGACTATTCAGTAAGG                   |
| <i>chiS</i> _PTP_RD_F                   | CACCTTGCCACTTCTGTTGGTCGCCGAT              |
| <i>chiS</i> _PTP_RD_R                   | TTAGAGGTGAGCGACAATGCGC                    |
| <i>vieS</i> _PTP_RD_F                   | CACCTTGGGTCACGTATTAGTGGCCGATGAT           |
| <i>vieS</i> _PTP_RD_R                   | TTAGAGTACTTTGCGCAAATTTGGCTAAG             |
| VC2369_PTP_RD_F                         | CACCTTGCTGAATATTTTCATGGTGAAGACATTGA       |
| VC2369_PTP_RD_R                         | TTACGTCATCTTCGCAATCACTTCTCG               |
| VC1831_PTP_RD_F                         | CACCTTGAAAGCCAAAACGTATCCCGG               |
| VC1831_PTP_RD_R                         | TTACTTACCGATGGTAAAGATG                    |
| <i>varS</i> _PTP_RD_F                   | CACCTTGTGCGTGCATGGCGGTCG                  |
| <i>varS</i> _PTP_RD_R                   | TTAGCTCCAATGTACCAACACTTGTGCA              |
| <b>Overexpression primers</b>           |                                           |
| VC0303_pBAD_F                           | GATCCTCGAGGATGCAAGGTTGGTTGGTAATTC         |
| VC0303_pBAD_R                           | GATCGAATTCCAGACAGACTATTCAGTAAGGCTCTCA     |
| VC1831_pBAD_F                           | GATCCTCGAGGTTGGTTATGGCTATTCGCTCCTCG       |
| VC1831_pBAD_R                           | GATCGAATTCCCTCTACCGATGGTAAAGATGGTTCC      |
| VCA0709_pBAD_F                          | GAGCTCGAGAGTGCAAACGCAGATTTGGCATGA         |
| VCA0709_pBAD_R                          | TCGAATTCCTTCTTTACTCAGCAAATCCAATGC         |
| VCA0719_pBAD_F                          | GATCCTCGAGCATGAGTGCCGAAGCGCAATA           |
| VC A0719_pBAD_R                         | GATCGAATTCCGATCGCAGGGAACAGTAAGGTA         |
| <i>chiS</i> _pBAD_F                     | GATCCTCGAGTTTGCCTCTATGCCACGCTT            |
| <i>chiS</i> _pBAD_R                     | GATCGAATTCCTTCACTGGTCAAGGATTTTTGCAA       |
| <i>cqsS</i> _pBAD_F                     | GATCCTCGAGAGTGATAGTGAGCATGGATGTAATAAAGAGA |
| <i>cqsS</i> _pBAD_R                     | GATCTCTAGAAACACCCAAGCTGCCACTTTATTTAG      |
| <i>luxQ</i> _pBAD_F                     | GATCCTGCAGGCTTGAACATTCGACCTAGCCAAATC      |
| <i>luxQ</i> _pBAD_R                     | GATCTCTAGAAAATTTAAGCCAGCGTTTTTTTGGCC      |
| <i>varS</i> _pBAD_F                     | GATCCTCGAGAATGACTCAAAGATATGGCTTGGCG       |
| <i>varS</i> _pBAD_R                     | GATCTCTAGAAAGTTCAGATAGTCGCGAGAGGCTTC      |
| <i>vpsS</i> _pBAD_F                     | GATCCTCGAGCATGAAAATGGATTCTGAATACACA       |
| <i>vpsS</i> _pBAD_R                     | GATCGAATTCCTGGATTAAGGAAACGTTTCACAAC       |

|                                       |                                             |
|---------------------------------------|---------------------------------------------|
| <i>vpsV_pBAD_F</i>                    | GATCCTCGAGAGTGTCTCATCTCACGTATACAAAACACTCGTT |
| <i>vpsV_pBAD_R</i>                    | GATCTCTAGAAATGCCTCATAAAATACAACAGAAGAAAT     |
| <b>Deletion primers</b>               |                                             |
| <i>vpsS_del_A</i>                     | CATGCCATGGGTGGATTGGGGATCACTCAGG             |
| <i>vpsS_del_B</i>                     | TGCTGCGGATTTTCAGAATCCATTTTCATGCCTC          |
| <i>vpsS_del_C</i>                     | GGATTCTGAAATCCGCAGCAAAGACATCATGG            |
| <i>vpsS_del_D</i>                     | GCTCTAGAGAAGGACTTCCCCACGGCTT                |
| <i>vpsV_del_A</i>                     | GCTCTAGACACGAGGAACCCGCGTTCAT                |
| <i>vpsV_del_B</i>                     | TACCGTGCGCTAGCCGCATTGAACGAGTTTTG            |
| <i>vpsV_del_C</i>                     | AATGCGGCTAGCGCACGGTAACTTAATGATTTT           |
| <i>vpsV_del_D</i>                     | CGAGCTCCGCTGATTTGAGCTTGAATCCC               |
| <i>vpsSV_del_A</i>                    | GATCTCTAGAGCCGAAAAACTCACAAAAGC              |
| <i>vpsSV_del_B</i>                    | TAATGGGGATGGTTGTTTTTAGCCGCATTG              |
| <i>vpsSV_del_C</i>                    | AAAAACAACCATCCCCATTATCGCACTCAC              |
| <i>vpsSV_del_D</i>                    | GATCGAGCTCGAAGCGTCAATCATGAGCAA              |
| <i>luxU_del_A</i>                     | CATGCCATGGCCGCTGCATTTACCGCCATT              |
| <i>luxU_del_B</i>                     | ATTGATGCGTGATCCATTCTCTCATCGCTTACC           |
| <i>luxU_del_C</i>                     | AGAATGGATCACGCATCAATGCTACTCCGA              |
| <i>luxU_del_D</i>                     | GCTCTAGACCATCCGATCTGGCAGCCCT                |
| <i>VC1080_del_A</i>                   | GATCGAGCTCAGATGGACGATCAACGGATG              |
| <i>VC1080_del_B</i>                   | GATTACTCACTGTGCGAAATGTTAAATGCGACACTC        |
| <i>VC1080_del_C</i>                   | CATTTTCGACAGTGAGTAATCGATGACAGTAGAAGC        |
| <i>VC1080_del_D</i>                   | GATCCCATGGATACTGCAATTTGGCGAAGC              |
| <i>VC2038_del_A</i>                   | CATGCCATGGGAAACCATCGCCAAACTGTTT             |
| <i>VC2038_del_B</i>                   | GCACAGACCTTGCCTTCGGATGAATTATCAA             |
| <i>VC2038_del_C</i>                   | TCCGAAGGCAAGGTCTGTGCCATGCCTAAC              |
| <i>VC2038_del_D</i>                   | GCTCTAGAGAATCAAAGCGGGTGATGAAG               |
| <i>VCA0939_del_A</i>                  | CGAGCTCGGGCAGCACTGGTGTACGCCCTTG             |
| <i>VCA0939_del_B</i>                  | CGGAGCGTCGCATAGGCTCACCTCTCACTG              |
| <i>VCA0939_del_C</i>                  | TGAGCCTATGCGACGCTCCGATCAAGCACTG             |
| <i>VCA0939_del_D</i>                  | GATCTCTAGACTAGGCGAGCGATGGCTTCTGGCG          |
| <i>luxQ_del_A</i>                     | ATCGCCATGGATATGAACGCGGTGCACC                |
| <i>luxQ_del_B</i>                     | TAAGCCTTGGCTAGGTGCAATGTTCAA                 |
| <i>luxQ_del_C</i>                     | AGCCAAGGCTTAAATTGAGCCAGCGAG                 |
| <i>luxQ_del_D</i>                     | CGATTCTAGACCTGAGGATACTTATGCG                |
| <i>cqsS_del_A</i>                     | ATCGCCATGGTGGATTTGATGGTGAAG                 |
| <i>cqsS_del_B</i>                     | CACTTTTACATCCATGCTCACTATCAC                 |
| <i>cqsS_del_C</i>                     | GATGTAAGAGTGGCAGCTTGGGTGTAG                 |
| <i>cqsS_del_D</i>                     | CGATGAGCTCGCATTTAGATCGTATGGC                |
| <b>Site-directed mutation primers</b> |                                             |
| <i>vpsR_5'_F</i>                      | ATCGCCATGGACGATGCTGAAGACCAAG                |
| <i>vpsR_5'_R</i>                      | CTGCTACTTGAGTACAGC                          |
| <i>vpsR_3'_F</i>                      | CGTGATGCACTGCTGCTG                          |
| <i>vpsR_3'_R</i>                      | CGATTCTAGACCGCAGCCTAATAAGAGG                |
| <i>vpsR_5'</i>                        | GATCGGATCCATGAGCACTCAATCCGTATGG             |
| <i>vpsR_3'</i>                        | CGATCTCGAGTTAGAAGTTTTCATCGGTGATC            |
| <i>vpsR_D59A_F</i>                    | GGTATTGTGGCTTTAAGCCATGATGAATTTAGC           |
| <i>vpsR_D59A_R</i>                    | ATGGCTTAAAGCCACAATACCAATACATGGCCC           |
| <i>vpsR_D59E_F</i>                    | GGTATTGTGGAATTAAGCCATGATGAATTTAGC           |
| <i>vpsR_D59E_R</i>                    | ATGGCTTAAATCCACAATACCAATACATGGCCC           |
| <b>Promoter cloning primers</b>       |                                             |
| <i>vpsT promoter F</i>                | GCTCTAGAGCGCTATCTTTTGTTTACTTGACGC           |
| <i>vpsT promoter R</i>                | CATGCCATGGCTCCTAACACATCAAGGCTAACATG         |
| <i>vpsR promoter F</i>                | GCTCTAGATGAACGATGCTGAAGACCAAGAT             |
| <i>vpsR promoter R</i>                | CATGCCATGGGTACTGAATCCATACGGAAT              |

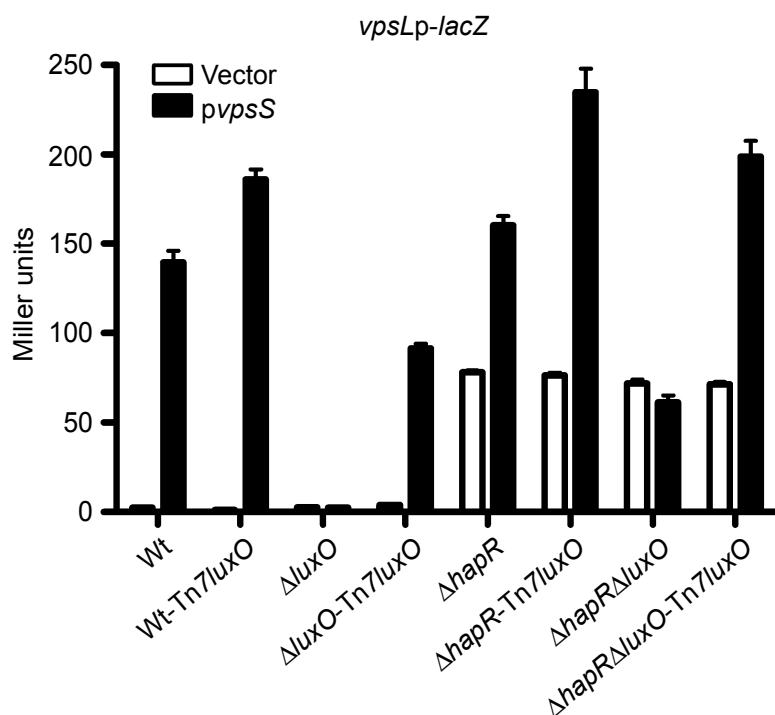

**Supplementary Fig. S1. Complementation of *vpsL* expression in  $\Delta luxO$  and  $\Delta luxO\Delta hapR$ .**

*VpsS* activation of *vpsL* expression was only observed in  $\Delta luxO$  and  $\Delta hapR\Delta luxO$  strains carrying a chromosomally-inserted copy of *luxO* ( $\Delta luxO$ -Tn7*luxO* and  $\Delta hapR\Delta luxO$ -Tn7*luxO*). Wild-type (Wt) and  $\Delta hapR$  strains, with or without Tn7*luxO* (Wt, Wt-Tn7*luxO*,  $\Delta hapR$  and  $\Delta hapR$ -Tn7*luxO*), exhibited increased *vpsL* expression when *vpsS* is overexpressed. Furthermore, while wild-type strains (with or without Tn7*luxO*) carrying the vector exhibited low basal level of *vpsL* expression,  $\Delta hapR$  strains (with or without Tn7*luxO*) carrying the vector exhibited a higher level of *vpsL* expression, consistent with the negative role of HapR on *vpsL* expression. Strains were grown in the presence of ampicillin and 0.2% arabinose. Error bars indicate standard deviations of 8 technical replicates. One representative experiment of 3 biological replicates is shown.

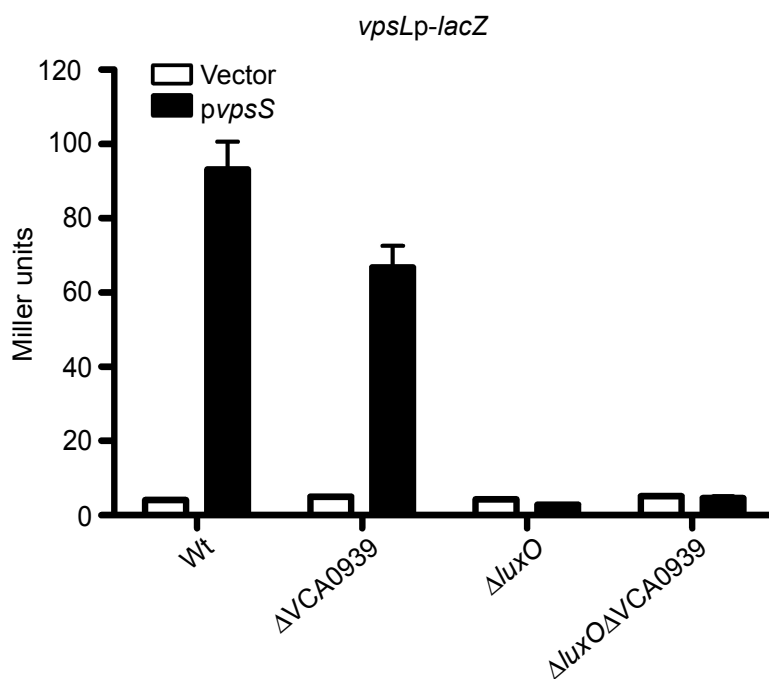

**Supplementary Fig. S2. VCA0939 does not regulate *vpsL* expression.** VCA0939, which encodes a protein predicted to contain a GGDEF domain and whose expression is regulated by LuxO but not HapR, is not involved in regulating *vpsL* expression. A  $\Delta$ VCA0939 strain, carrying the overexpression plasmid *pvpsS*, exhibited VpsS activation of *vpsL* expression, similar to that of wild type (Wt). As expected, deletion of *luxO* in both wild-type and  $\Delta$ VCA0939 strains abolished VpsS activation of *vpsL* expression to the basal level observed in all strains carrying the control vector. Strains were grown in the presence of ampicillin and 0.2% arabinose. Error bars indicate standard deviations of 8 technical replicates. One representative experiment of 4 biological replicates is shown.
